# Supplementary material for: Higher Level of Sports Activities Participation during Five-Year Survival Is Associated with Better Quality of Life among Chinese Breast Cancer Survivors
Source: MDPI journal article supplement (doi:10.3390/cancers13236056), 2021-12-01
Supplement: s1 [file s1]

Supplementary Table S1. Modified Chinese Baecke Questionnaire [25]

| <b>Work Index</b>                                                                                                                                                                                                                                                                                                        |                                                                                                                        |                                                                                                                                                    |
|--------------------------------------------------------------------------------------------------------------------------------------------------------------------------------------------------------------------------------------------------------------------------------------------------------------------------|------------------------------------------------------------------------------------------------------------------------|----------------------------------------------------------------------------------------------------------------------------------------------------|
| 1. What is your main occupation?...                                                                                                                                                                                                                                                                                      |                                                                                                                        | 1-3-5                                                                                                                                              |
| 2. Do you often sit at work?                                                                                                                                                                                                                                                                                             | Never/seldom/sometimes/always                                                                                          | 4 - 3 - 2 - 1                                                                                                                                      |
| 3. Do you often stand at work?                                                                                                                                                                                                                                                                                           | Never/seldom/sometimes/always                                                                                          | 1 - 2 - 3 - 4                                                                                                                                      |
| 4. Do you often walk at work?                                                                                                                                                                                                                                                                                            | Never/seldom/sometimes/always                                                                                          | 1 - 2 - 3 - 4                                                                                                                                      |
| 5. Do you often lift heavy loads at work?                                                                                                                                                                                                                                                                                | Never/seldom/sometimes/always                                                                                          | 1 - 2 - 3 - 4                                                                                                                                      |
| 6. Do you often feel physically tired after working?                                                                                                                                                                                                                                                                     | Never/seldom/sometimes/always                                                                                          | 1 - 2 - 3 - 4                                                                                                                                      |
| 7. Do you often sweat at work?                                                                                                                                                                                                                                                                                           | Never/seldom/sometimes/always                                                                                          | 1 - 2 - 3 - 4                                                                                                                                      |
| 8. When compared with people of your own age and sex, do you think your work is physically much heavier or lighter?                                                                                                                                                                                                      | Lighter/as heavy/heavier                                                                                               | 1 - 2 - 3                                                                                                                                          |
| <b>Sport Index</b>                                                                                                                                                                                                                                                                                                       |                                                                                                                        |                                                                                                                                                    |
| 9. Do you play sport when you don't need to work or do household activities? Yes/No<br>If yes: –which sport do you play most frequently? . . .<br>–how many hours a week?<br>–how many months a year?<br>If you play a second sport:<br>–which sport is it? . . .<br>–how many hours a week?<br>–how many months a year? | 1 / 3 / 5<br>0/<1/1-2/2-3/3-4/>4<br>0/<1/1-3/4-6/7-9/>9<br><br>1 / 3 / 5<br>0/<1/1-2/2-3/3-4/>4<br>0/<1/1-3/4-6/7-9/>9 | 0.76-1.26-1.76<br>0-0.5-1.5-2.5-3.5-4.5<br>0-0.04-0.17-0.42-0.67-0.92<br><br>0.76-1.26-1.76<br>0-0.5-1.5-2.5-3.5-4.5<br>0-0.04-0.17-0.42-0.67-0.92 |
| 10. In comparison with others of my own age I think my physical activity during leisure time is . . .                                                                                                                                                                                                                    | Less/the same/more                                                                                                     | 1 - 2 - 3                                                                                                                                          |
| 11. Do you play sport during leisure time?                                                                                                                                                                                                                                                                               | Never/seldom/sometimes/often                                                                                           | 1 - 2 - 3 - 4                                                                                                                                      |
| <b>Leisure Time Index</b>                                                                                                                                                                                                                                                                                                |                                                                                                                        |                                                                                                                                                    |
| 12. Do you often watch television/video/laser disc/see movie during leisure time?                                                                                                                                                                                                                                        | Never/seldom/sometimes/always                                                                                          | 4 - 3 - 2 - 1                                                                                                                                      |
| 13. Do you often walk for pleasure during leisure time?                                                                                                                                                                                                                                                                  | Never/seldom/sometimes/always                                                                                          | 1 - 2 - 3 - 4                                                                                                                                      |
| 14. How many minutes per day do you walk and/or cycle to and from work, school, and shopping?                                                                                                                                                                                                                            | <10/10-30/30-60/60-120/>120                                                                                            | 1 - 2 - 3 - 4 - 5                                                                                                                                  |
| 15. Do you often go shopping (not including grocery shopping) during leisure time?                                                                                                                                                                                                                                       | Never/seldom/sometimes/often/very often                                                                                | 1 - 2 - 3 - 4                                                                                                                                      |
| 16. Do you often play mahjong during leisure time?                                                                                                                                                                                                                                                                       | Never/seldom/sometimes/often/very often                                                                                | 4 - 3 - 2 - 1                                                                                                                                      |
| <b>Housework Index</b>                                                                                                                                                                                                                                                                                                   |                                                                                                                        |                                                                                                                                                    |
| 17. Do you often do heavy household work (e.g., extensive clean-up, washing floors, washing windows, washing toilet, washing kitchen, cleaning all furniture and electrical appliances, hanging wet linens, etc.)?                                                                                                       | Never/seldom/sometimes/often                                                                                           | 1 - 2 - 3 - 4                                                                                                                                      |

|                                                                                                                                                                                                                                                                                                                                                                                                                                                                                                                                                                                                                                                                                                                                                                                                                                                                                                                                                                                                      |                                                                                               |                   |
|------------------------------------------------------------------------------------------------------------------------------------------------------------------------------------------------------------------------------------------------------------------------------------------------------------------------------------------------------------------------------------------------------------------------------------------------------------------------------------------------------------------------------------------------------------------------------------------------------------------------------------------------------------------------------------------------------------------------------------------------------------------------------------------------------------------------------------------------------------------------------------------------------------------------------------------------------------------------------------------------------|-----------------------------------------------------------------------------------------------|-------------------|
| 18. Do you often do light household work (e.g., general clean-up, dusting, vacuuming, sweeping floor, handwashing clothes, hanging clothes, ironing, hanging linen, etc.)?                                                                                                                                                                                                                                                                                                                                                                                                                                                                                                                                                                                                                                                                                                                                                                                                                           | Never/seldom/sometimes/often                                                                  | 1 - 2 - 3 - 4     |
| 19. Do you often prepare meals?                                                                                                                                                                                                                                                                                                                                                                                                                                                                                                                                                                                                                                                                                                                                                                                                                                                                                                                                                                      | Never/seldom/sometimes/often                                                                  | 1 - 2 - 3 - 4     |
| 20. Do you often wash dishes?                                                                                                                                                                                                                                                                                                                                                                                                                                                                                                                                                                                                                                                                                                                                                                                                                                                                                                                                                                        | Never/seldom/sometimes/often                                                                  | 1 - 2 - 3 - 4     |
| 21. Do you often do grocery shopping?                                                                                                                                                                                                                                                                                                                                                                                                                                                                                                                                                                                                                                                                                                                                                                                                                                                                                                                                                                | Never/seldom/sometimes/often                                                                  | 1 - 2 - 3 - 4     |
| 22. How many days per week do you go to the market?                                                                                                                                                                                                                                                                                                                                                                                                                                                                                                                                                                                                                                                                                                                                                                                                                                                                                                                                                  | 1-2/3-4/5-7                                                                                   | 1 - 2 - 3         |
| 23. How many minutes/hours per day on average do you walk to and from grocery shopping (not including transportation time)?<br><br>(If not doing grocery shopping every day, write down on average how many days per week he/she does it.)                                                                                                                                                                                                                                                                                                                                                                                                                                                                                                                                                                                                                                                                                                                                                           | <10/10-30/30-60/60-120/>120                                                                   | 1-2-3-4-5         |
| 24. How many hours per day do you sleep on average?                                                                                                                                                                                                                                                                                                                                                                                                                                                                                                                                                                                                                                                                                                                                                                                                                                                                                                                                                  | <7/7+ hours                                                                                   | 1 - 1.5           |
| <p>Calculation of the score for question 9</p> <p>If type of sport = 1, then Intensity = 0.76</p> <p>If type of sport = 3, then Intensity = 1.26</p> <p>If type of sport = 5, then Intensity = 1.76</p><br><p>If number of hours a week = &lt;1 then Time = 0.5</p> <p>If number of hours a week = 1-2 then Time = 1.5</p> <p>If number of hours a week = 2-3 then Time = 2.5</p> <p>If number of hours a week = 3-4 then Time = 3.5</p> <p>If number of hours a week = &gt;4 then Time = 4.5</p><br><p>If number of months a year = &lt;1 then Proportion = 0.04</p> <p>If number of months a year = 1-3 then Proportion = 0.17</p> <p>If number of months a year = 4-6 then Proportion = 0.42</p> <p>If number of months a year = 7-9 then Proportion = 0.67</p> <p>If number of months a year = &gt;9 then Proportion = 0.92</p><br><p>Question 9 = (Intensity<sub>1</sub> * Time<sub>1</sub> * Proportion<sub>1</sub>) + (Intensity<sub>2</sub> * Time<sub>2</sub> * Proportion<sub>2</sub>)</p> | <p>0/0.01-&lt;4/4-&lt;8/8-&lt;12/≥12*</p> <p>*0 is given to people who do not play sport.</p> | 1 - 2 - 3 - 4 - 5 |
| <p>Calculation of physical activity indices</p> <p>The subscript for I corresponds to the question item number.</p> <p>WORK INDEX (WI) = (I<sub>1</sub> + I<sub>2</sub> + I<sub>3</sub> + I<sub>4</sub> + I<sub>5</sub> + I<sub>6</sub> + I<sub>7</sub> + I<sub>8</sub>)/8</p> <p>SPORTS INDEX (SI) = (I<sub>9</sub> + I<sub>10</sub> + I<sub>11</sub>)/3</p>                                                                                                                                                                                                                                                                                                                                                                                                                                                                                                                                                                                                                                        |                                                                                               |                   |

LEISURE TIME INDEX (LTI) =  $(I_{12} + I_{13} + I_{14} + I_{15} + I_{16})/5$

HOUSEWORK INDEX (HWI) =  $(I_{17} + I_{18} + I_{19} + I_{20} + I_{21} + I_{22} + I_{23})/7$

TOTAL INDEX (TI) = = WI + SI + LTI + HWI

Reference 25. Ho SC, Yu R, Chan S: Comparison of the modified Chinese Baecke Questionnaire with a 3-day activity diary in a Hong Kong Chinese population. Asia Pac J Public Health 27:Np2358-71, 2015
